# Supplementary material for: Retrieval algorithm for rainfall mapping from microwave links in a cellular communication network
Source: Copernicus journal article supplement (doi:10.5194/amtd-8-8191-2015), 2015-08-07
Supplement: Supplementary file [file amtd-8-8191-2015-supplement-title-page.pdf › amtd-8-8191-2015-supplement-title-page.pdf]

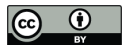

## *Supplement of*

# **Retrieval algorithm for rainfall mapping from microwave links in a cellular communication network**

**A. Overeem et al.**

*Correspondence to:* A. Overeem (overeem@knmi.nl)

- amtd-8-8191-2015-supplement-title-page.pdf
- WorkingExample
  - Figure\_Timeseries\_Power\_Rainfall.R
  - Figure\_Timeseries\_Power\_Rainfall.R
  - InterpolationGrid.dat
  - Interpolation\_Rainfall\_Intensities.R
  - LinkData\_Original
    - \* linkdata20110910.dat
    - \* linkdata20110911.dat
  - Preprocessing\_Linkdata.R
  - Radar\_201109102045\_15min.dat
  - Radar\_20110911\_daily.dat
  - RainfallMapping.R
  - RainfallRetrieval\_Links.R
  - WGS84\_coordinates\_Utrecht\_20110911\_LinkTimeseries.dat
  - WetDryClassification\_LinkApproach.R
  - ab\_values\_vertical.txt
  - radar\_gaugeadjusted\_15min.dat

The copyright of individual parts of the supplement might differ from the CC-BY 3.0 licence.
